# Supplementary material for: Four xanthene–fluorene based probes for the detection of Hg2+ ions and their application in strip tests and biological cells
Source: Royal Society of Chemistry journal article supplement (doi:10.1039/d0nj05155a), 2020-12-10
Supplement: d0nj05155a1.pdf [file d0nj05155a1.pdf]

New Journal of Chemistry  
Electronic Supplementary Information  
for

**Four Xanthene-fluorene based probes for the detection of Hg<sup>2+</sup> ions and its  
application in strip test and biological cells**

Guozhi Zhao<sup>1</sup> Yucheng Sun<sup>1</sup> Hongdong Duan<sup>1\*</sup>

<sup>1</sup>School of Chemistry and Chemical Engineering, Qilu University of Technology  
(Shandong Academy of Sciences), Ji'nan, Shandong Province, 250353, China

\*Corresponding author.

Tel: +86 13153035598

E-mail address: dhd@qlu.edu.cn(H. Duan)

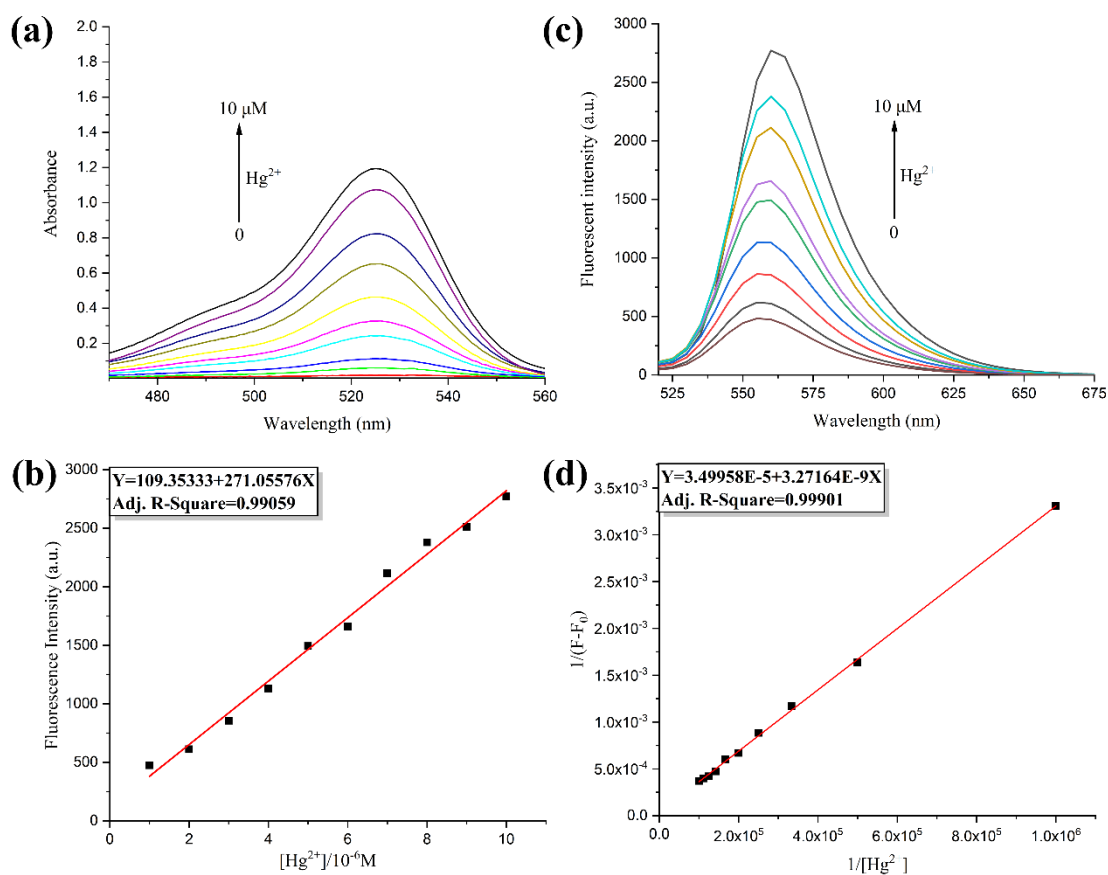

**Fig. S1.** (a) Absorption spectra of Probe 2 (10  $\mu\text{M}$ ) upon the addition of  $\text{Hg}^{2+}$  (1.0-10.0  $\mu\text{M}$ ) in DMSO: PBS buffer solution (1:1, v/v). (b) Linear curve in the concentration range of 0.1  $\mu\text{M}$  to 10  $\mu\text{M}$ . (insert) the corresponding fluorescence spectra. (c) Fluorescence spectra of Probe 2 (10  $\mu\text{M}$ ) upon the addition of  $\text{Hg}^{2+}$  (1.0-10.0  $\mu\text{M}$ ) in DMSO: PBS buffer solution (1:1, v/v). (d) Benesi-Hildebrand plot of Probe 2 using 1:1 stoichiometry for association between probe1 and  $\text{Hg}^{2+}$ .

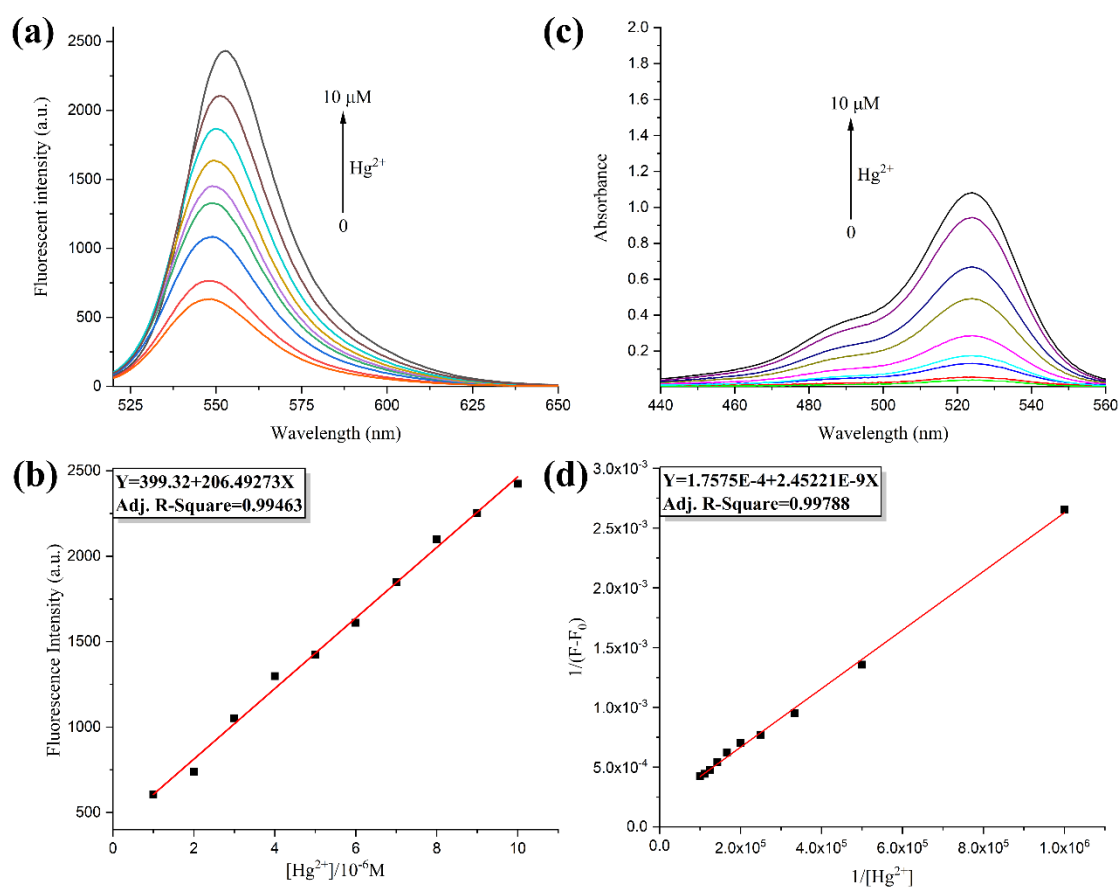

**Fig. S2.** (a) Absorption spectra of Probe 3 (10  $\mu\text{M}$ ) upon the addition of  $\text{Hg}^{2+}$  (1.0-10.0  $\mu\text{M}$ ) in DMSO: PBS buffer solution (1:1, v/v). (b) Linear curve in the concentration range of 0.1  $\mu\text{M}$  to 10  $\mu\text{M}$ . (insert) the corresponding fluorescence spectra. (c) Fluorescence spectra of Probe 3 (10  $\mu\text{M}$ ) upon the addition of  $\text{Hg}^{2+}$  (1.0-10.0  $\mu\text{M}$ ) in DMSO: PBS buffer solution (1:1, v/v). (d) Benesi-Hildebrand plot of Probe 3 using 1:1 stoichiometry for association between probe1 and  $\text{Hg}^{2+}$ .

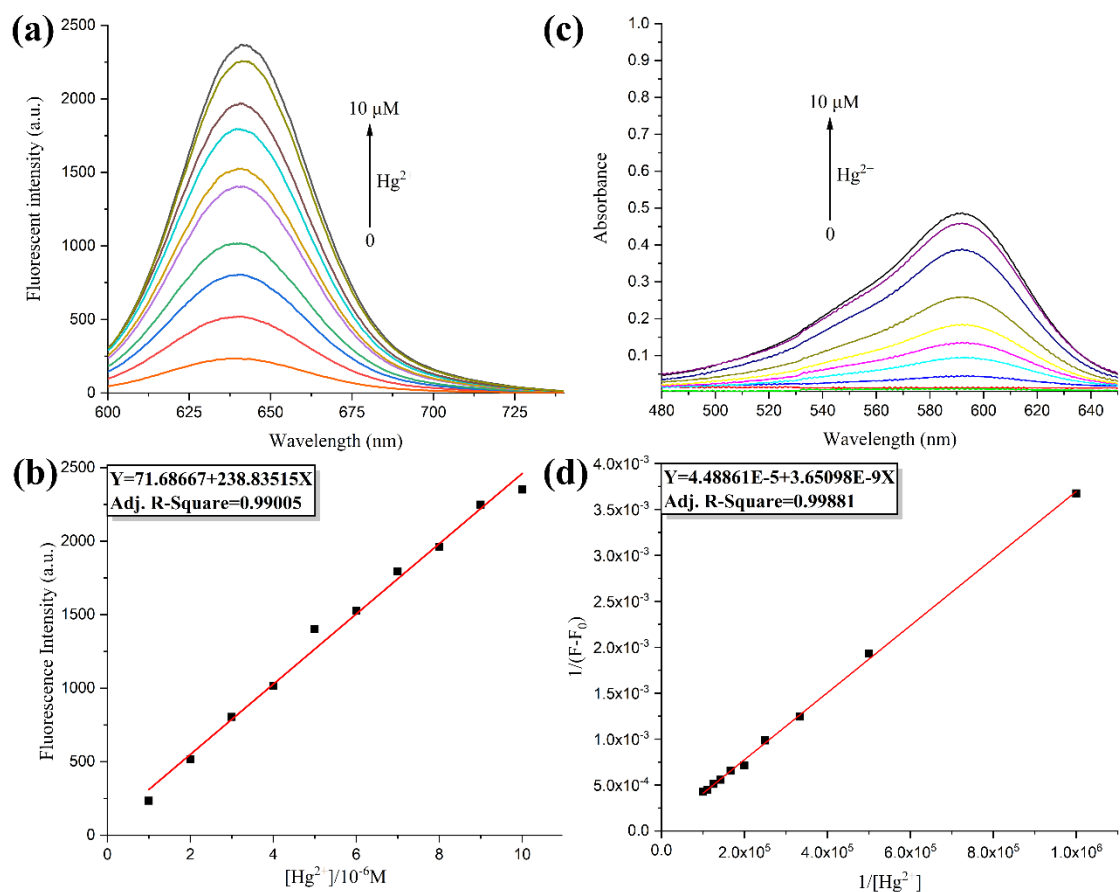

**Fig. S3.** (a) Absorption spectra of Probe 4 (10  $\mu\text{M}$ ) upon the addition of  $\text{Hg}^{2+}$  (1.0-10.0  $\mu\text{M}$ ) in DMSO: PBS buffer solution (1:1, v/v). (b) Linear curve in the concentration range of 0.1  $\mu\text{M}$  to 10  $\mu\text{M}$ . (insert) the corresponding fluorescence spectra. (c) Fluorescence spectra of Probe 4 (10  $\mu\text{M}$ ) upon the addition of  $\text{Hg}^{2+}$  (1.0-10.0  $\mu\text{M}$ ) in DMSO: PBS buffer solution (1:1, v/v). (d) Benesi-Hildebrand plot of Probe 4 using 1:1 stoichiometry for association between probe1 and  $\text{Hg}^{2+}$ .
